1 **A novel, dichloromethane-fermenting bacterium in the *Peptococcaceae* family,**  
2 **'*Candidatus Formamonas warabiya*', gen. nov. sp. nov.**

3 Sophie I Holland<sup>1</sup>, Haluk Ertan<sup>2,3</sup>, Michael J Manefield<sup>1,3</sup>, Matthew Lee<sup>1</sup>

4 <sup>1</sup>Water Research Centre, School of Civil and Environmental Engineering, University of New South  
5 Wales, Sydney, Australia

6 <sup>2</sup>Department of Molecular Biology and Genetics, Istanbul University, Turkey

7 <sup>3</sup>School of Chemical Engineering, University of New South Wales, Sydney, Australia

8

9 **Running Title**

10 A novel, dichloromethane fermenting bacterium

11

12 **Corresponding author**

13 Matthew Lee

14 Water Research Centre

15 School of Civil and Environmental Engineering

16 University of New South Wales

17 E: mattlee@unsw.edu.au

18 T: (+61 2) 9385 9677

19

20 **Abstract**

21 Dichloromethane (DCM; CH<sub>2</sub>Cl<sub>2</sub>) is a toxic groundwater pollutant that also has a detrimental effect  
22 on atmospheric ozone levels. As a dense non-aqueous phase liquid, DCM migrates vertically  
23 through groundwater to low redox zones, yet information on anaerobic microbial DCM  
24 transformation remains scarce due to a lack of cultured organisms. We report here the  
25 characterisation of strain DCMF, the dominant organism in an anaerobic enrichment culture  
26 (DFE) that is capable of fermenting DCM to the environmentally benign product acetate. Stable  
27 carbon isotope experiments demonstrated that the organism assimilated carbon from DCM and  
28 bicarbonate via the Wood-Ljungdahl pathway. Strain DCMF is the first anaerobic DCM-degrading  
29 bacterium also shown to metabolise non-chlorinated substrates. It appears to be a methylotroph  
30 utilising the Wood-Ljungdahl pathway for metabolism of methyl groups from methanol, choline,  
31 and glycine betaine, which has implications for the flux of climate-active compounds from  
32 subsurface environments. Community profiling and enrichment of the cohabiting taxa in culture  
33 DFE to the exclusion of strain DCMF suggest that it is the sole organism in this culture responsible  
34 for substrate metabolism, while the cohabitants persist via necromass recycling. Genomic and  
35 physiological evidence support placement of strain DCMF in a novel genus, '*Candidatus*  
36 *Formamonas warabiya*'.

37

38 **Abbreviations:** DCM, dichloromethane; FISH, fluorescence *in situ* hybridisation; GC-FID, gas  
39 chromatography with flame ionisation detector; GC-PDD, gas chromatography with pulse  
40 discharge detector; GC-TQMS, gas chromatography with triple quadrupole mass spectrometry;  
41 LC-MS/MS, liquid chromatography with tandem mass spectrometry; MRM, multiple reaction  
42 monitoring; WLP, Wood-Ljungdahl pathway.

## 43 **Introduction**

44 Dichloromethane (DCM, CH<sub>2</sub>Cl<sub>2</sub>) is one of the most commonly encountered subsurface pollutants  
45 in industrial areas (1). Current global production of DCM exceeds 900 Gg y<sup>-1</sup>, of which 70% is  
46 manufactured by humans (2). The remaining 30% comes from natural sources including biomass  
47 burning, oceanic sources, and geothermal activity (2). Due to widespread production and use of  
48 DCM, both surface and tropospheric levels of this toxic chemical continue to rise (3–6).  
49 Atmospherically, DCM has recently been recognised as a potent greenhouse gas with detrimental  
50 effects on ozone (7). The compound also poses a threat to human health (8,9) and microbial  
51 function (10–12).

52 Microbial transformation of DCM is an option for remediation of oxic and anoxic environments.  
53 Aerobic DCM transformation is catalysed by a DCM dehalogenase found in facultative  
54 methylotrophs (13,14), but the enzyme responsible for anaerobic DCM dechlorination has not yet  
55 been identified. DCM is a dense non-aqueous phase liquid that descends through groundwater to  
56 low redox zones, and so anaerobic degradation plays a vital role in its removal from contaminated  
57 sites. Yet study of anaerobic DCM degradation has been hindered by the highly limited number of  
58 organisms capable of this metabolism. *Dehalobacterium formicoaceticum* strain DMC is the only  
59 isolate (15) and from the handful of enrichment cultures (16–18), only ‘*Candidatus*  
60 *Dichloromethanomonas elyunquensis*’ strain RM has been characterised (19,20). Both *D.*  
61 *formicoaceticum* and ‘*Ca. Dichloromethanomonas elyunquensis*’ are obligate anaerobic DCM-  
62 degrading bacteria and have genome sequences available (15,19,21,22). A combination of  
63 genomic, physiological and proteomic work has demonstrated the central role of the Wood-  
64 Ljungdahl pathway (WLP) in DCM metabolism in both organisms, however variations on the  
65 pathway result in different end products (15,20,23). *D. formicoaceticum* ferments DCM to formate  
66 and acetate in a 2:1 molar ratio (15), whilst ‘*Ca. Dichloromethanomonas elyunquensis*’ completely  
67 mineralises DCM to H<sub>2</sub> and CO<sub>2</sub> (23).

A novel, dichloromethane fermenting bacterium

Holland *et al* (2020)

68 A new anaerobic DCM degrading bacterium, strain DCMF, was recently subjected to whole  
69 genome sequencing and also encoded a complete WLP (24). Strain DCMF is the dominant  
70 organism in a non-methanogenic bacterial consortium, designated culture DFE (24). The  
71 community was enriched from an organochlorine-contaminated aquifer near Botany Bay,  
72 Sydney, Australia and culture DFE has been maintained on DCM as the sole energy source (24).  
73 However, genome-based metabolic modelling suggested that strain DCMF may have a wider  
74 substrate repertoire due to the presence of 81 full-length MttB superfamily methyltransferases  
75 and glycine/betaine/sarcosine reductase genes (24).

76 Here, we report that strain DCMF is the first non-obligate anaerobic DCM degrading bacterium  
77 and characterise its metabolism of DCM, quaternary amines, and methanol, whilst also  
78 considering the role of the cohabiting bacteria in culture DFE. Stable carbon isotope labelling was  
79 used to determine the fate of DCM carbon and function of the WLP. Based on its genomic and  
80 physiological novelty, strain DCMF is proposed to form a novel genus within the *Peptococcaceae*  
81 family. Using contemporary molecular and traditional cultivation techniques (including exclusion  
82 cultivation – removal the dominant taxon), this study represents a thorough and robust  
83 characterisation of a novel bacterium despite its presence in a multi-lineage enrichment culture.  
84 This supports recent initiatives to redefine how bacterial lineages are formally recognised (25).

## 85 **Materials and Methods**

### 86 *Culture medium*

87 Culture DFE was grown in anaerobic, defined bicarbonate-buffered mineral salts medium as  
88 previously described (24). To investigate the requirement for exogenous bicarbonate during DCM  
89 degradation, cultures were instead buffered with 3-morpholinopropane-1-sulfonic acid (MOPS,  
90 4.2 g l<sup>-1</sup>), either with or without 4 mM NaHCO<sub>3</sub>. To study the metabolic fate of DCM, <sup>13</sup>C-labelled  
91 DCM ([<sup>13</sup>C]DCM, 1 mM) was used. To study the assimilation of inorganic carbon, <sup>13</sup>C-labelled  
92 bicarbonate (NaH<sup>13</sup>CO<sub>3</sub>, 5 mM) was added to MOPS-buffered culture medium.

A novel, dichloromethane fermenting bacterium

Holland *et al* (2020)

93 To test alternative growth substrates, DCM was replaced with the following (5 mM unless stated  
94 otherwise): carbon monoxide (2 mM), choline chloride, dibromomethane, dimethylglycine,  
95 formic acid, H<sub>2</sub>, glycine betaine, methanol, sarcosine, syringic acid, trimethylamine. Cultures  
96 amended with choline chloride, glycine betaine, and trimethylamine were also amended with the  
97 following compounds as electron acceptors (15 mM unless otherwise stated): fumarate (80 mM,  
98 tested with trimethylamine only), NaNO<sub>2</sub>, NaNO<sub>3</sub>, Na<sub>2</sub>SO<sub>3</sub> and Na<sub>2</sub>SO<sub>4</sub>. Acetate, H<sub>2</sub>, and lactate  
99 were tested as electron donors with Na<sub>2</sub>SO<sub>3</sub> and Na<sub>2</sub>SO<sub>4</sub> as electron acceptors. Glycine betaine and  
100 sarcosine (5 mM) were tested as electron donors with H<sub>2</sub> (10 mM) as electron acceptor.

### 101 *Analytical methods*

102 DCM, dibromomethane, acetate, formate, methanol, and trimethylamine were quantified using a  
103 Shimadzu Plus GC-2010 gas chromatograph with flame ionisation detector (GC-FID) equipped  
104 with a headspace autosampler (PAL LHS2-xt-Shim; Shimadzu, Rydalmere, Australia; Table S1).  
105 HCO<sub>3</sub><sup>-</sup> (as gaseous CO<sub>2</sub>) and H<sub>2</sub> were quantified using a Shimadzu GC-2010 gas chromatograph  
106 with pulsed discharge detector (GC-PDD; Table S1). In all analyses, the inlet temperature was  
107 250°C, split ratio 1:10, FID temperature 250°C or PDD temperature 150°C.

108 Choline and glycine betaine were quantified using liquid chromatography with tandem mass  
109 spectrometry (LC-MS/MS). The Agilent 1200 Series LC (Agilent Technologies, Mulgrave,  
110 Australia) was fitted with a Luna C18(2) column (150 × 4.6 mm, 5 µm; Phenomenex, Lane Cove  
111 West, Australia). The mobile phases were 0.5 mM ammonium acetate in water (A) and 100%  
112 methanol (B). Samples (5 µl) were eluted with a linear gradient from 95:5 (A:B) to 0:100 (A:B)  
113 over 10 min, then held at 0:100 (A:B) for 1 min. The LC was coupled to an Applied Biosystems  
114 QTRAP 4000 quadrupole mass spectrometer (SCIEX, Mulgrave, Australia) and electrospray  
115 ionization performed in the positive mode. The machine was operated in multiple reaction  
116 monitoring (MRM) mode and the following precursor-product ion transitions were used for  
117 quantification:  $m/z$  104.0 → 59.0 (choline) and  $m/z$  118.0 → 57.7 (glycine betaine).

A novel, dichloromethane fermenting bacterium

Holland *et al* (2020)

118 Labelled and unlabelled acetate, CO<sub>2</sub>, and HCO<sub>3</sub><sup>-</sup> were quantified via GC with triple quadrupole  
119 mass spectrometry (GC-TQMS) performed with an Agilent 7890A GC system (Table S1). The  
120 TQMS was operated in MRM mode identifying the following precursor-product ion transitions:  
121  $m/z$  43 → 15.2 (unlabelled acetate),  $m/z$  44 → 15.1 ([1-<sup>13</sup>C]acetate),  $m/z$  44 → 16 ([2-<sup>13</sup>C]acetate),  
122  $m/z$  45 → 16.1 ([1,2-<sup>13</sup>C]acetate),  $m/z$  45 → 29 (<sup>13</sup>CO<sub>2</sub>),  $m/z$  44 → 28 (<sup>12</sup>CO<sub>2</sub>).

123 GC-TQMS in MRM mode was also used to quantify dimethylamine, methylamine, sarcosine, and  
124 glycine, using alanine as an internal standard. Following derivatisation (26) (Table S1), the  
125 following precursor-product ion transitions were used:  $m/z$  117.2 → 89.1 (dimethylamine),  $m/z$   
126 103.2 → 74.9 (methylamine),  $m/z$  116.2 → 44.1 (sarcosine and alanine), and 102 → 30.1  
127 (glycine).

#### 128 *Bacterial quantification*

129 Genomic DNA was extracted from 2 ml liquid culture as previously described (24). Strain DCMF  
130 and total bacterial 16S rRNA genes were quantified via quantitative real-time PCR (qPCR) with  
131 primers Dcm775/Dcm930 and Eub1048/Eub1194 (27), respectively (Table S2). Standard curves  
132 were prepared by making serial 10-fold dilutions of plasmid DNA carrying cloned strain DCMF  
133 16S rDNA or *Dehalococcoides* sp. 16S rDNA (for total bacterial quantification). Reactions were  
134 carried out on a CFX96 thermal cycler (Bio-Rad) and the data was analysed with CFX Maestro  
135 v1.0 software (Bio-Rad). Strain DCMF 16S rRNA gene copy numbers were converted to cell  
136 numbers by dividing by four (the number of 16S rRNA genes in the genome).

#### 137 *16S rRNA gene amplicon sequencing*

138 Community profiling was carried out on the above DNA samples. The 16S rRNA gene was  
139 amplified with the 515F/806R primer pair with adapters (Table S2). Samples were sequenced  
140 with Illumina MiSeq technology by The Hawkesbury Institute for the Environment Next  
141 Generation Sequencing Facility. Amplicon reads were processed in QIIME2 (28) using the dada2  
142 pipeline (29): forward and reverse reads were trimmed and joined, chimeras were removed, and

A novel, dichloromethane fermenting bacterium

Holland *et al* (2020)

143 samples were rarefied to the lowest sequencing depth. Taxonomy was assigned to genus level  
144 using a Naïve Bayes classifier trained on a full-length 16S rRNA gene SILVA database (release  
145 133) and the lowest 1% abundant reads were filtered out. Alpha diversity was assessed with  
146 Shannon's diversity index and pairwise comparisons made with a Kruskal-Wallis test. A two-  
147 dimensional PCA plot was created from the weighted Unifrac distance matrix. Samples were  
148 compared by the proportion of substrate consumed, as well as timepoint, to account for differing  
149 metabolic rates between substrates (Table S3).

#### 150 *Exclusion cultivation of DFE cohabitant bacteria*

151 To eliminate strain DCMF and enrich the cohabiting bacteria in culture DFE, two rounds of  
152 dilution to extinction cultures (20 ml) were set up in 30 ml glass serum bottles (Fig S1). These  
153 were prepared with the standard medium amended with one of: casamino acids (5 g l<sup>-1</sup>), ethanol  
154 (10 mM), glucose (10 mM), peptone (5 g l<sup>-1</sup>), 1-propanol (10 mM), yeast extract (5 g l<sup>-1</sup>). Following  
155 qPCR confirmation that strain DCMF was below the limit of detection in the lowest active dilution  
156 culture, these cultures were subject to Illumina 16 rRNA gene amplicon sequencing and used to  
157 inoculate triplicate microcosms amended with one of: 1 mM DCM, 5 mM choline chloride, or 5  
158 mM glycine betaine (Fig S1), which were monitored for eight weeks.

#### 159 *Fluorescence in situ hybridisation microscopy*

160 Fluorescence in situ hybridisation (FISH) was carried out with a strain DCMF-specific  
161 oligonucleotide probe (Dcm623, 5'-/Cy3/CTCAAGTGCCATCTCCGA-3'), designed using ARB (30),  
162 and probe Eub338i (5'-/6-FAM/GCTGCCTCCCGTAGGAGT-3') (31) to target all bacteria. FISH was  
163 carried out as per an established protocol for fixation on a polycarbonate membrane, using  
164 minimal volumes of reagents (32). Cells were fixed with protocols for both Gram negative (31)  
165 and Gram positive cell walls (33). Hybridisation was carried out with a formamide-free buffer.  
166 Cells were counterstained with VECTASHIELD® Antifade Mounting Medium containing 1.5 µg ml<sup>-1</sup>  
167 4,6-diamidino-2-phenylindole (Vector Laboratories, Burlingame, CA, USA). Images were  
168 captured on a BX61 microscope equipped with a DP80 camera (Olympus Australia, Notting Hill,

A novel, dichloromethane fermenting bacterium

Holland *et al* (2020)

169 Australia) using Olympus cellSens Dimension software v2.1. Strain DCMF cell length and width  
170 was determined from a sample of 20 cells using the linear measurement tool within the program.

## 171 **Results**

### 172 *Dichloromethane fermentation*

173 Culture DFE consumed  $1.9 \pm 0.0$  mM DCM within 35 days, yielding  $3.7 \pm 2.2 \times 10^8$  strain DCMF  
174 cells ml<sup>-1</sup> (Fig 1A), or  $2.0 \pm 1.2 \times 10^{14}$  strain DCMF cells per mole of substrate consumed. The  
175 product of DCM fermentation was acetate ( $1.4 \pm 0.1$  mM; Fig 1A), which was not observed in  
176 abiotic controls. DCM attenuation did not proceed in MOPS-buffered cultures free of bicarbonate  
177 Fig 1B). However, in analogous cultures amended with 4 mM NaHCO<sub>3</sub>, DCM attenuation was  
178 observed, yet HCO<sub>3</sub><sup>-</sup> concentrations did not significantly change ( $p = 0.11$ , two-tailed t-test  
179 between days 0 and 65; Fig 1B).



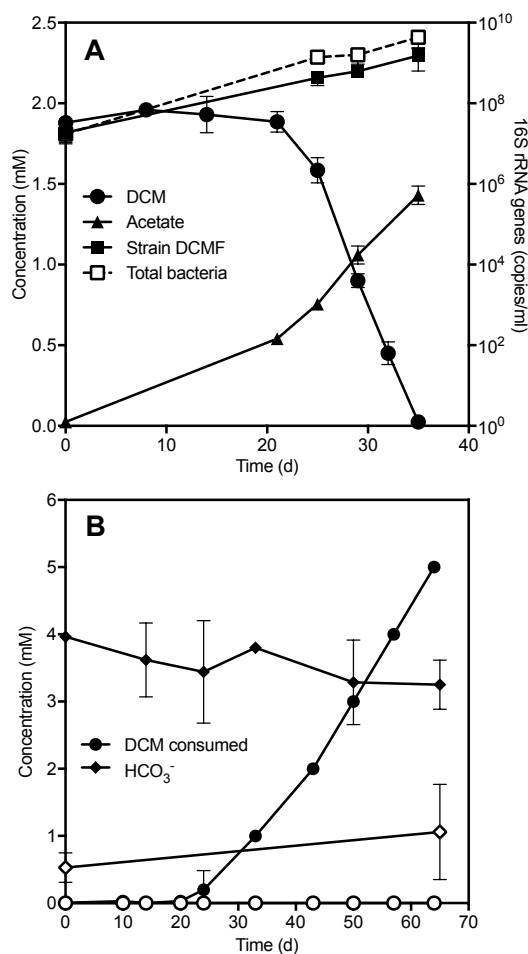

180

181 **Figure 1 Strain DCMF ferments DCM to acetate, reliant on exogenous bicarbonate.** (A) Strain DCMF  
182 growth was concomitant with the depletion of DCM and formation of acetate. Error bars represent standard  
183 deviation,  $n = 2$ . Substrate and product concentrations are quantified on the left y-axis; strain DCMF and  
184 total bacterial 16S rRNA gene copies are quantified on the right y-axis. (B) In MOPS-buffered medium, DCM  
185 consumption was only observed in the presence of bicarbonate (filled circles). Cumulative DCM  
186 consumption is from repeat amendment of 1 mM DCM. Empty circles represent cultures with no exogenous  
187 bicarbonate. Error bars represent standard deviation,  $n = 3$ .

### 188 *Metabolism of quaternary amines and methanol*

189 Of the additional substrates tested as sole energy source or with an electron acceptor, strain  
190 DCMF growth was observed when methanol, choline or glycine betaine (5 mM each) were  
191 supplied (Fig 2). Culture DFE consumed methanol ( $4.3 \pm 0.2$  mM) over 30 days, yielding  $3.1 \pm 0.1$   
192 mM acetate and  $2.4 \pm 0.6 \times 10^9$  strain DCMF cells ml<sup>-1</sup> (Fig 2A). This corresponded to  $5.7 \pm 1.4 \times$

A novel, dichloromethane fermenting bacterium

Holland *et al* (2020)

193  $10^{14}$  strain DCMF cells per mole substrate utilised. No methanol depletion was observed in the  
194 abiotic (cell-free) control.

195 Culture DFE consumed choline ( $4.8 \pm 0.2$  mM) within 25 days, producing  $15 \pm 0.6$  mM acetate and  
196  $6.0 \pm 1.1$  mM methylamine (Fig 2B). Glycine betaine ( $4.7 \pm 0.3$  mM) was consumed within 21 days,  
197 with production of  $11 \pm 0.4$  mM of acetate and  $4.5 \pm 0.6$  mM methylamine (Fig 2C).  
198 Trimethylamine, dimethylamine, sarcosine (methylglycine), and glycine were not detectable  
199 throughout. Neither acetate nor methylamine were detected in abiotic controls, and the latter was  
200 also absent from cultures amended with DCM. Strain DCMF cell proliferation aligned with the  
201 consumption of these two substrates, yielding an increase of  $1.4 \pm 0.4 \times 10^9$  and  $5.3 \pm 0.4 \times 10^8$   
202 cells ml<sup>-1</sup> in choline- and glycine betaine-amended cultures, respectively (Fig 2B, C). This  
203 corresponded to  $3.0 \pm 0.9 \times 10^{14}$  cells per mole of choline, and  $1.1 \pm 0.1 \times 10^{14}$  cells per mole of  
204 glycine betaine utilised.

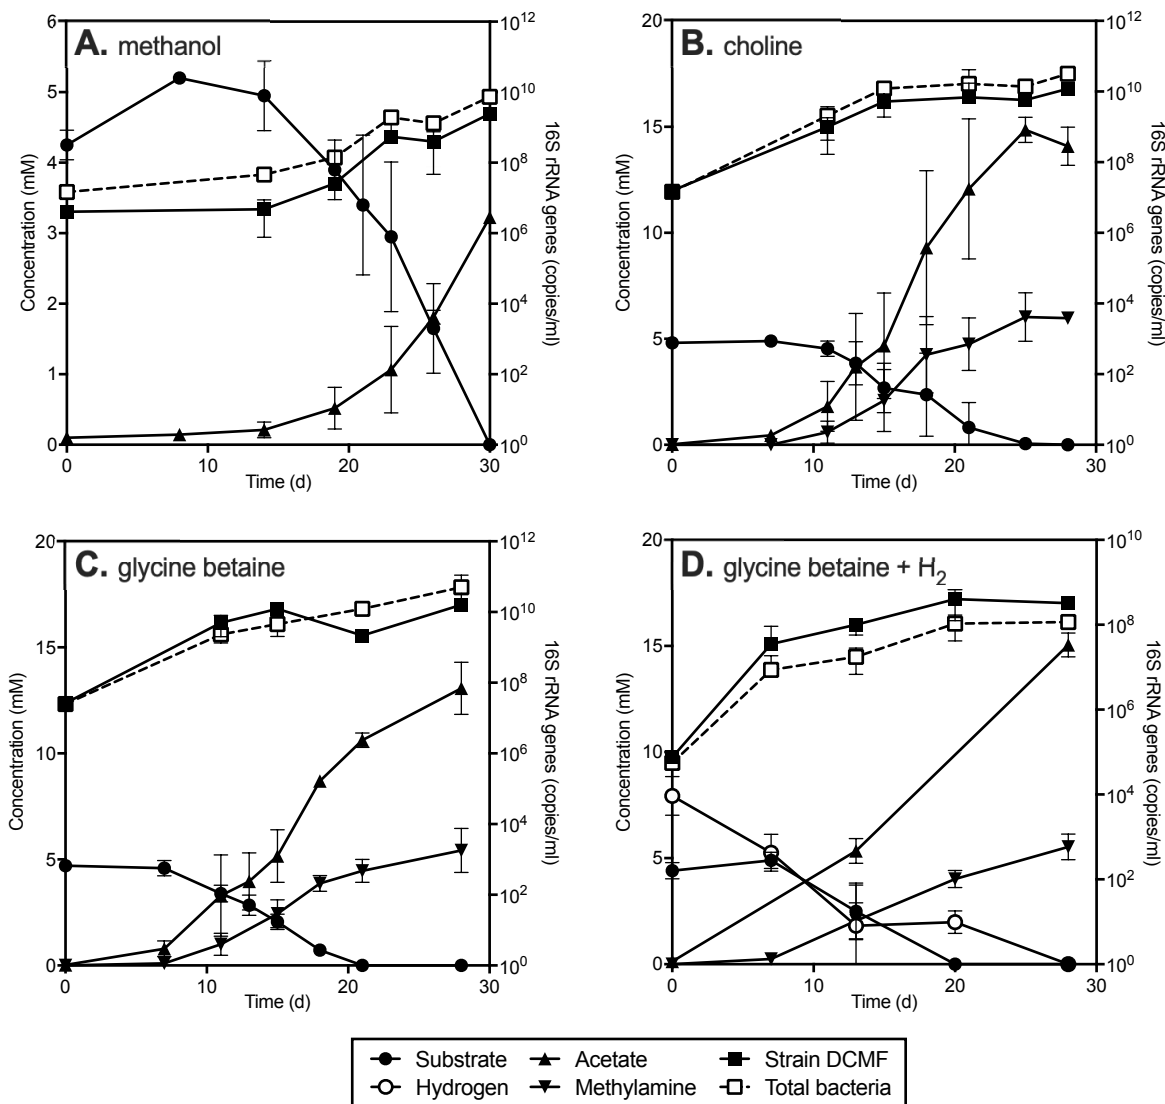

205

206 **Figure 2 Strain DCMF growth was also correlated with the metabolism of methanol and quaternary**

207 **amines.** Strain DCMF growth correlated with the depletion of methanol and formation of acetate (A) and

208 the depletion of choline (B) and glycine betaine (C) with formation of acetate and methylamine. Cultures

209 amended with glycine betaine and hydrogen (D) did not produce trimethylamine, rather acetate and

210 methylamine were once again the products. Substrate and product concentrations are quantified on the

211 left y-axis; strain DCMF and total bacterial 16S rRNA gene copies are quantified on the right y-axis. Error

212 bars represent standard deviation,  $n = 3$ .

213 DFE cultures amended with quaternary amine metabolic pathway intermediates dimethylglycine

214 and sarcosine +  $H_2$  also demonstrated production of acetate and methylamine, which again

215 aligned with strain DCMF cell proliferation (Fig S2). Sarcosine was not degraded in the absence

A novel, dichloromethane fermenting bacterium

Holland *et al* (2020)

216 of H<sub>2</sub> (data not shown). Following the observation of strain DCMF growth and methylamine  
217 production in cultures amended with sarcosine + H<sub>2</sub>, DFE cultures were also set up with glycine  
218 betaine + H<sub>2</sub> to determine whether glycine betaine could be reductively cleaved to trimethylamine  
219 and acetate. These cultures consumed all glycine betaine (4.4 ± 0.4 mM) and hydrogen (7.9 ± 0.9  
220 mM) within 28 days, producing 15 ± 0.6 mM acetate and 5.5 ± 0.6 mM methylamine, but no  
221 trimethylamine (Fig 2D). Strain DCMF cell yields (4.0 ± 2.8 × 10<sup>8</sup> cells ml<sup>-1</sup>) were similar to that  
222 when glycine betaine was the sole energy source.

223 Culture DFE was unable to utilise CO, dibromomethane, ethanol, formate, syringic acid or  
224 trimethylamine as sole energy sources (no growth and/or acetogenesis observed). Strain DCMF  
225 was further unable to use any of the tested pairs of electron donors (acetate, choline, glycine  
226 betaine, H<sub>2</sub>, lactate, trimethylamine) and acceptors (CO<sub>2</sub>, fumarate, Na<sub>2</sub>SO<sub>4</sub>, Na<sub>2</sub>SO<sub>3</sub>, NaNO<sub>2</sub>, and  
227 NaNO<sub>3</sub>).

#### 228 *Shifts in DFE community composition in response to substrate consumption*

229 Community profiling with Illumina 16S rRNA gene amplicon sequencing showed that culture DFE  
230 is composed of a limited number of taxa – only 12 amplicon sequencing variants (ASVs) were  
231 present at ≥ 2% relative abundance in > 1 sample (Fig 3). Community composition was similar in  
232 cultures amended with DCM, choline, and glycine betaine, which had a common, DCM-amended  
233 inoculum (Fig 3A,B,C), but was simplified in cultures that had been maintained on methanol for  
234 two sub-cultivations and had a methanol-amended inoculum (Fig 3D; Fig S3A). While strain  
235 DCMF was the dominant organism at the time of inoculation and during substrate consumption,  
236 its relative abundance decreased markedly in the lag phase prior to substrate consumption,  
237 falling to as little as 0.96% in a methanol-amended replicate at day 14 (Fig 3). Taxa such as  
238 *Synergistaceae* (except in methanol-amended cultures, where this taxon was absent),  
239 *Desulfovibrio* and *Veillonellaceae* increased in relative abundance during this lag phase, while  
240 *Spirochaetaceae* and *Lentimicrobiaceae* increased towards the end of and following substrate  
241 depletion, particularly in quaternary amine-amended cultures (Fig 3).

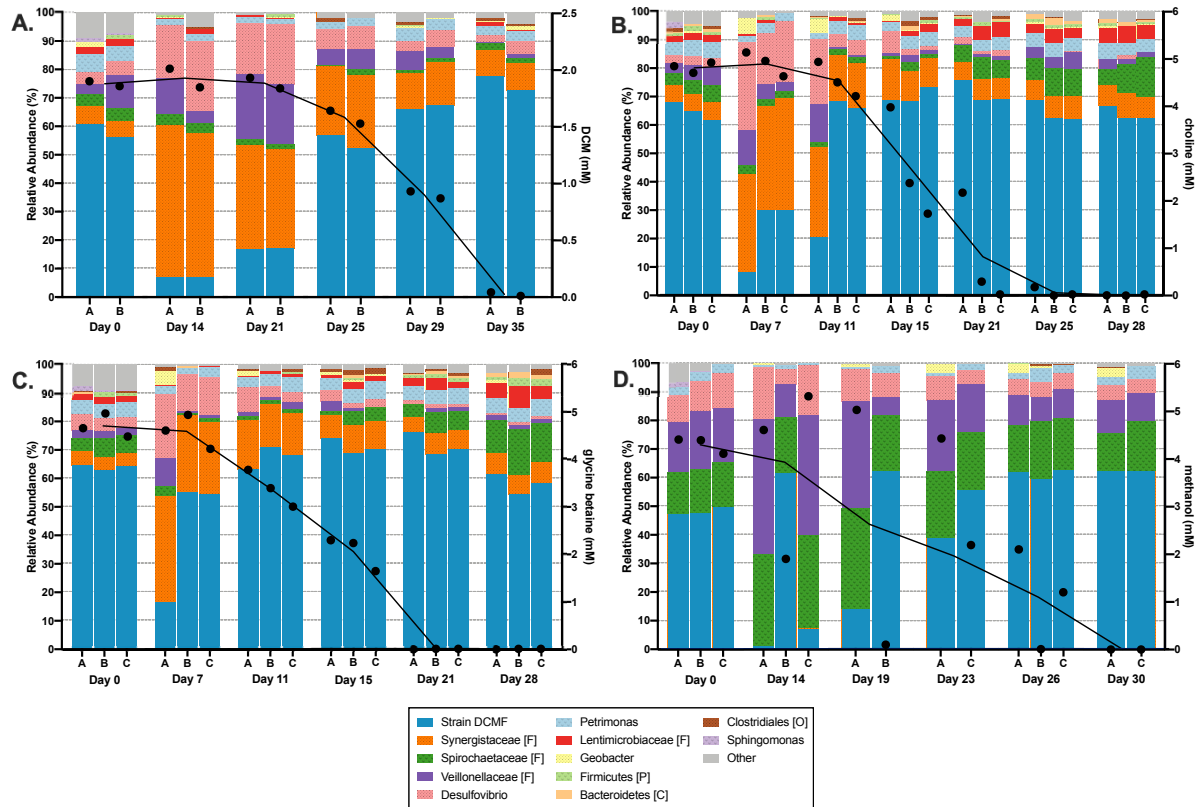

242

243 **Figure 3 Culture DFE is subject to temporal shifts in community composition, with strain DCMF**  
 244 **dominant during substrate degradation.** Illumina 16S rRNA amplicon sequencing was used to determine  
 245 DFE community composition (left y axis) at timepoints across the growth experiments amended with (A)  
 246 DCM, (B) choline, (C) glycine betaine, and (D) methanol reported in Figs 1 and 2. Taxa are reported down  
 247 to genus level where possible, otherwise taxonomic level is indicated in the legend ([F] = family, [P] =  
 248 phylum, [C] = class, [O] = order). Reads with <1% abundance were filtered out in QIIME2. Unassigned reads  
 249 and taxa consistently <2% relative abundance were classed together as 'Other'. Substrate concentration  
 250 (black circles, right y-axis) and a line connecting the mean substrate concentration at each time point is  
 251 overlaid on the community composition graphs. These are aligned with the time points written on the x-  
 252 axis, not drawn to scale.

253 Differences in the DFE community were driven by the degree of substrate consumption (defined  
 254 in Table S3), more than the various substrates (Fig S3B). While there was no significant difference  
 255 in the Shannon diversity index between the samples when grouped by substrate (Kruskal-Wallis

A novel, dichloromethane fermenting bacterium

Holland *et al* (2020)

256 p-value 0.0976; Fig S3C), there was a highly significant difference between all groups when  
257 clustered by substrate consumption (Kruskal-Wallis p-value <0.00001; Fig S3D).

258 *Exclusion of cohabitants as DCM and quaternary amine consumers*

259 Attempts to isolate strain DCMF proved unsuccessful (24). Therefore, to test the hypothesis that  
260 strain DCMF was the sole consumer of DCM and quaternary amines, the cohabiting bacteria in  
261 culture DFE were enriched to the exclusion of strain DCMF (exclusion cultivation). This was  
262 achieved by dilution to extinction cultures on rich media amended with casamino acids, glucose,  
263 peptone or yeast extract. These growth conditions variously enriched *Bacillus*, *Desulfovibrio*,  
264 *Geobacter*, *Petrimonas*, and *Veillonellaceae*, but not strain DCMF (Fig S4E-H). *Spirochaetaceae* and  
265 *Synergistaceae* phylotypes did not grow on the tested rich media.

266 The strain DCMF-free cohabitant cultures were then tested for their ability to utilise DCM, choline,  
267 and glycine betaine. There was no significant substrate depletion in these cultures (Fig S4A-D),  
268 and therefore no evidence of DCM, choline, or glycine betaine degradation by the *Bacillus*,  
269 *Desulfovibrio*, *Geobacter*, *Petrimonas*, or *Veillonellaceae* phylotypes in culture DFE.

270 *Strain DCMF morphology*

271 FISH microscopy enabled selective visualisation of strain DCMF cells, which appeared rod-shaped  
272 and occurred singly or in chains (Fig 4A). On average, strain DCMF cells were  $1.69 \pm 0.27 \mu\text{m}$  long  
273 and  $0.64 \pm 0.12 \mu\text{m}$  wide. FISH images confirmed that strain DCMF numerically dominated culture  
274 DFE during DCM dechlorination, congruent with community profiling results (Fig 4C).

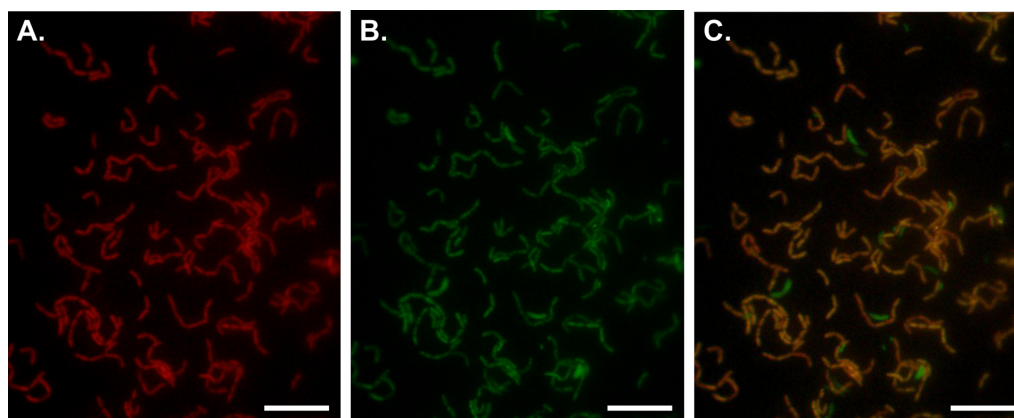

275

276 **Figure 4 Morphology of strain DCMF.** Fluorescence in situ hybridisation (FISH) microscopy images with  
277 strain DCMF cells stained red with the Cy3-labelled Dcm623 probe (A), all bacterial cells stained green with  
278 the 6-FAM-labelled Eub338i probe (B), and the overlay of Cy3- and 6-FAM-labelling in these images (C).  
279 The scale bars represent 10  $\mu\text{M}$ .

280 *Strain DCMF is mixotrophic*

281 To ascertain the fate of DCM carbon, triplicate DFE cultures were amended with [ $^{13}\text{C}$ ]DCM. When  
282  $2\,700 \pm 328 \mu\text{M}$  DCM had been consumed,  $666 \pm 160 \mu\text{M}$  of acetate was produced (Fig 5A), of  
283 which  $47.1 \pm 5.5\%$  was unlabelled,  $30.4 \pm 2.8\%$  was methyl group labelled ([ $2\text{-}^{13}\text{C}$ ]acetate), and  
284  $22.5 \pm 4.3\%$  was both methyl and carboxyl group labelled ([ $1,2\text{-}^{13}\text{C}$ ]acetate; Fig 5C). A  $^{13}\text{C}$  mass  
285 balance was achieved by summing the measured concentrations of  $^{13}\text{C}$ -labelled carbon in acetate  
286 ( $670 \pm 289 \mu\text{M}$ ) and  $\text{H}^{13}\text{CO}_3^-$  ( $815 \pm 120 \mu\text{M}$ ) with the calculated concentrations of  $^{13}\text{CO}_2$  in the  
287 flask headspace ( $982 \pm 144 \mu\text{M}$ ) and [ $^{13}\text{C}$ ]acetate equivalents in biomass ( $994 \pm 121 \mu\text{M}$ ; Fig 5B,  
288 Table S4). This amounted to  $128 \pm 8.2\%$  recovery of the labelled carbon, indicating no unknown  
289 fate of DCM in culture DFE.

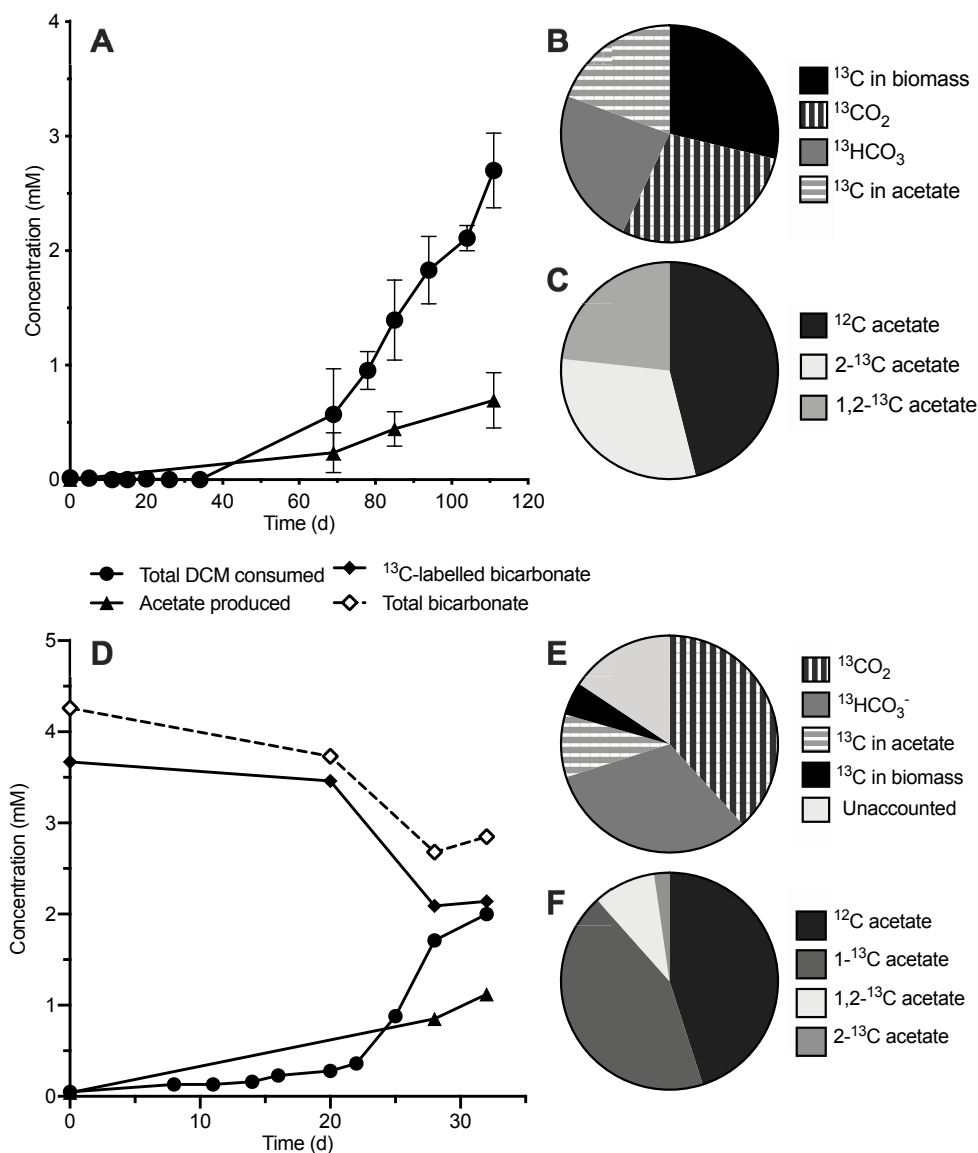

290

291 **Figure 5 Strain DCMF assimilates carbon from DCM and bicarbonate to form acetate.**

292 (A) Cumulative [<sup>13</sup>C]DCM consumption with concomitant with acetate production, including the <sup>13</sup>C mass  
293 balance from [<sup>13</sup>C]DCM (B) and proportion of labelled and unlabelled acetate (C). Error bars represent  
294 standard deviation, *n* = 3. (D) Cumulative DCM consumption and acetate production in cultures amended  
295 with H<sup>13</sup>CO<sub>3</sub><sup>-</sup>. Total (labelled and unlabelled) aqueous HCO<sub>3</sub><sup>-</sup> is also shown (i.e. gaseous CO<sub>2</sub> is not accounted  
296 for here). Values in (D) are from a single representative culture as all triplicates had similar dechlorination  
297 rates and product concentrations but began dechlorinating at different times. The <sup>13</sup>C mass balance from  
298 H<sup>13</sup>CO<sub>3</sub><sup>-</sup> (E) and proportion of labelled and unlabelled acetate (F) is again shown. All pie charts represent  
299 the average of triplicate cultures at the final time point.



A novel, dichloromethane fermenting bacterium

Holland *et al* (2020)

300 Analogous work was then carried out with unlabelled DCM in MOPS-buffered medium amended  
301 with  $^{13}\text{C}$ -labelled bicarbonate, showing that strain DCMF incorporated carbon from  $\text{CO}_2$  into the  
302 carboxyl group of acetate. The culture consumed  $2000\ \mu\text{M}$  DCM and  $2150 \pm 492\ \mu\text{M}$   $^{13}\text{C}$  from  
303 bicarbonate. It produced  $973 \pm 140\ \mu\text{M}$  acetate (Fig 5D), of which  $45.0 \pm 2.3\%$  was unlabelled,  
304  $43.5 \pm 1.8\%$  was labelled on the carboxyl group ( $[1\text{-}^{13}\text{C}]$ acetate),  $2.2 \pm 1.3\%$  was labelled on the  
305 methyl group, and  $9.3 \pm 0.1\%$  was labelled on both carbons (Fig 5F). A mass balance indicated  
306  $84.5 \pm 7.0\%$  recovery of the labelled carbon in acetate ( $600 \pm 84.9\ \mu\text{M}$ ), the remaining  $\text{H}^{13}\text{CO}_3^-$   
307 ( $2280 \pm 170\ \mu\text{M}$ ) and  $^{13}\text{CO}_2$  ( $2740 \pm 204\ \mu\text{M}$ ), and strain DCMF biomass ( $710 \pm 9.74\ \mu\text{M}$ ; Fig 5E,  
308 Table S4).

## 309 **Discussion**

### 310 *The DFE community*

311 Strain DCMF is a novel bacterium present in enrichment culture DFE, which has been maintained  
312 with DCM as sole external source of energy for five years and at least 20 consecutive transfers  
313 (24). Of the five other phylotypes previously reported in culture DFE, based on 16S rRNA genes  
314 identified from genome sequencing data (24), four remained amongst the most abundant in the  
315 present work (*Desulfovibrio*, *Lentimicrobiaceae*, *Spirochaetaceae* and *Synergistaceae*), while one  
316 was no longer detected (*Ignavibacteria*). In combination with the similar community profiles  
317 observed across four different substrates, this suggests that culture DFE is a long-term stable-  
318 state community.

319 Illumina amplicon sequencing, FISH microscopy and qPCR all supported the previous observation  
320 (24) of strain DCMF as the dominant organism in culture DFE during substrate consumption, and  
321 linked growth of strain DCMF to depletion of DCM, methanol, choline, and glycine betaine.  
322 Attempts to generate an axenic culture of strain DCMF have been unsuccessful, similar to the  
323 DCM-mineralising bacterium '*Ca. Dichloromethanomonas elyunquensis*' in culture RM (19,23).  
324 How the cohabiting organisms in both cultures persist despite numerous transfers and addition  
325 of only a simple chlorinated compound (DCM) to minimal, anaerobic medium is a question of

A novel, dichloromethane fermenting bacterium

Holland *et al* (2020)

326 interest. While hydrogenotrophic acetogens and methanogens form major sub-populations in  
327 culture RM (18,19,23), culture DFE is non-methanogenic (24) and was unable to grow on H<sub>2</sub>+CO<sub>2</sub>  
328 alone.

329 Instead, the timing of the changes in relative abundance and known substrate range of major  
330 phylotypes in culture DFE suggest that the cohabiting bacteria use cellular detritus resulting from  
331 expired strain DCMF cells as an energy source (i.e. necromass fermentation). Some of the most  
332 abundant cohabiting phylotypes in culture DFE – *Desulfovibrio*, *Bacteroidetes* (containing the  
333 families *Lentimicrobiaceae* and *Petrimonas*), *Spirochaetes/Treponematales*, *Synergistetes* – have  
334 previously been associated with hydrocarbon and organohalide-degrading mixed cultures (34–  
335 38), although their abundance was not linked to degradation of the primary substrate (with the  
336 exception of some *Desulfovibrio* species) and some reports also suggested that they persist via  
337 necromass recycling (16,37–39).

338 Five of the 12 taxa in culture DFE were categorically excluded from being primary metabolisers  
339 of DCM, choline, and glycine betaine when tested in the absence of strain DCMF (Fig S4).  
340 *Spirochaetaceae* and *Synergistaceae* phylotypes could not be enriched to the exclusion of strain  
341 DCMF. However, their relative abundance during growth on DCM, choline, and glycine betaine  
342 diminished relative to strain DCMF, suggesting that it is unlikely that they are primary consumers  
343 of these substrates. This needs to be confirmed by proteomic assessment of the DFE community.

#### 344 *The role of the WLP in DCM metabolism*

345 Amongst anaerobic DCM-dechlorinating bacteria, strain DCMF is unique in producing solely  
346 acetate as an end product (Fig 1A). *D. formicoaceticum* produced formate and acetate in a 2:1  
347 molar ratio (15), while '*Ca. Dichloromethanomonas elyunquensis*' completely mineralised DCM  
348 to H<sub>2</sub>, CO<sub>2</sub> and Cl<sup>-</sup> (23). The latter organism is unique in also encoding and expressing reductive  
349 dehalogenases during growth with DCM (19,20). Despite these differences, both organisms utilise  
350 the WLP for DCM metabolism (15,20,23) as is likely the case with strain DCMF. Removal of

351 bicarbonate from the culture medium precluded DCM dechlorination and ensuing work with <sup>13</sup>C-  
352 labelled DCM and bicarbonate demonstrated that strain DCMF is mixotrophic, i.e. assimilates  
353 carbon from both DCM and CO<sub>2</sub>, similar to *D. formicoaceticum* (23).

354 These experiments also provided compelling evidence for the transformation of DCM to a WLP  
355 intermediate, mostly likely methylene-tetrahydrofolate (CH<sub>2</sub>=FH<sub>2</sub>; Eq. 1). The production of  
356 H<sup>13</sup>CO<sub>3</sub><sup>-</sup> from [<sup>13</sup>C]DCM suggested that CH<sub>2</sub>=FH<sub>2</sub> is disproportionated into the WLP where it is  
357 oxidised to HCO<sub>3</sub><sup>-</sup> (Eq. 2, Fig 6). The electrons released then reduce the remaining CH<sub>2</sub>=FH<sub>2</sub> into  
358 the methyl group of acetate (Eq. 3). However, the production of unlabelled acetate (47%)  
359 indicates that the excess unlabelled HCO<sub>3</sub><sup>-</sup> (30 mM) in the medium is an alternative electron  
360 acceptor to CH<sub>2</sub>=FH<sub>2</sub> for acetogenesis (Eq. 4; Fig 6). The reduction of HCO<sub>3</sub><sup>-</sup> to acetate requires  
361 twice as many electrons for acetate synthesis than CH<sub>2</sub>=FH<sub>2</sub> (i.e. eight vs. four). Taking this ratio  
362 into account, along with ~1:1 ratio of unlabelled to labelled acetate suggests that approximately  
363 67% of electrons derived from DCM oxidation were directed toward HCO<sub>3</sub><sup>-</sup> reduction and 33% to  
364 CH<sub>2</sub>=FH<sub>2</sub>.

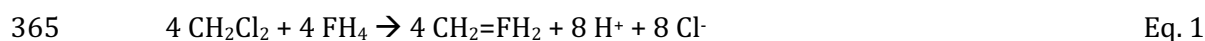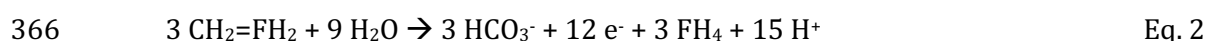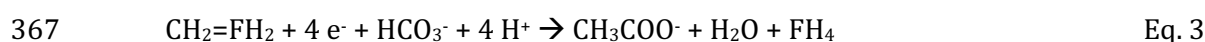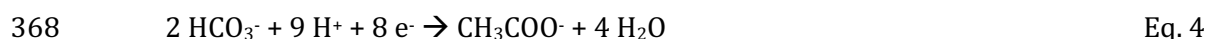

369 The production of [1,2-<sup>13</sup>C]acetate from [<sup>13</sup>C]DCM is consistent with the reduction of H<sup>13</sup>CO<sub>3</sub><sup>-</sup>  
370 outlined above. However, the proportion (22.5%) was surprisingly high, given the relatively small  
371 contribution that labelled H<sup>13</sup>CO<sub>3</sub><sup>-</sup> from 2.7 mM [<sup>13</sup>C]DCM would make to the 30 mM unlabelled  
372 HCO<sub>3</sub><sup>-</sup> present in the culture medium. It is possible that co-localisation of WLP proteins in the  
373 cytoplasm may cause the reduction of H<sup>13</sup>CO<sub>3</sub><sup>-</sup> at a higher ratio than expected (i.e. 9%). Studies  
374 with [<sup>13</sup>C]DCM in *D. formicoaceticum* detected the <sup>13</sup>C label solely in the methyl group of acetate  
375 ([2-<sup>13</sup>C] acetate), congruent with DCM oxidation stopping at formate (23,40), while studies with

376 another *Dehalobacterium* species in mixed culture that was capable of formate oxidation similarly  
 377 detected [1,2-<sup>13</sup>C]acetate (41).

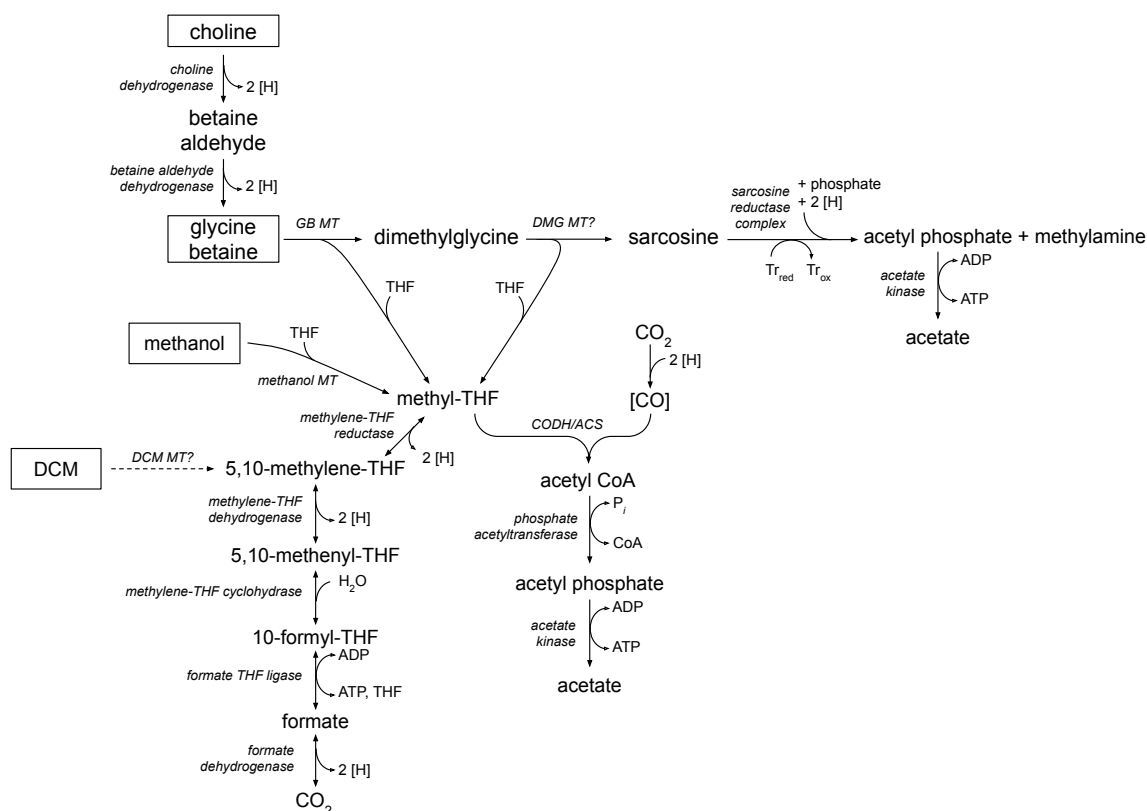

378

379 **Figure 6 Proposed model for metabolism of DCM, methanol and quaternary amines by strain DCMF.**

380 The Wood-Ljungdahl pathway is central to transformation of all substrates into acetate. Proteins (with the  
 381 exception of that catalysing the putative transformation of DCM to CH<sub>2</sub>=FH<sub>2</sub>, indicated by dotted arrow) are  
 382 all identified in the strain DCMF genome and listed in Table S5. Abbreviations: CODH/ACS, carbon  
 383 monoxide dehydrogenase/acetyl-CoA synthase; DCM, dichloromethane; DH, dehydrogenase; DMG,  
 384 dimethylglycine; GB, glycine betaine; MT, methyltransferase; ox, oxidised; red, reduced; THF,  
 385 tetrahydrofolate; Tr, thioredoxin.

386 DFE cultures amended with unlabelled DCM and <sup>13</sup>C-labelled HCO<sub>3</sub><sup>-</sup> in MOPS-buffered medium  
 387 produced an analogous proportion of [1-<sup>13</sup>C]acetate. A similar proportion of acetate (45.0%) to  
 388 that observed in the [<sup>13</sup>C]DCM work was unlabelled, in this case evidently formed using unlabelled  
 389 HCO<sub>3</sub><sup>-</sup> produced from DCM. Thus, the <sup>13</sup>C-labelling experiments support the hypothesis that DCM  
 390 metabolism involves the WLP and are consistent with the oxidation of formate to HCO<sub>3</sub><sup>-</sup>. As an

A novel, dichloromethane fermenting bacterium

Holland *et al* (2020)

391 exogenous supply of formate was unable to stimulate growth of culture DFE, strain DCMF alone  
392 is likely responsible for formate metabolism, which contrasts with the inability of *D.*  
393 *formicoaceticum* to further transform this metabolite (15). The production of HCO<sub>3</sub><sup>-</sup> from formate  
394 balances with its uptake during acetogenesis, congruent with a net flux of approximately zero,  
395 leading to the proposal that DCM is transformed as per Equation 5.

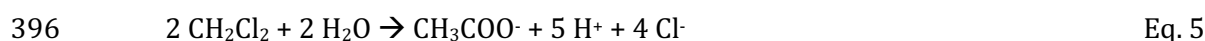

397 *Metabolism of non-chlorinated substrates*

398 Strain DCMF is the first non-obligate anaerobic DCM-degrading bacterium. A genome-based  
399 metabolic model previously suggested that the abundance of MttB superfamily  
400 methyltransferases (named for their founding member, a trimethylamine:corrinoid  
401 methyltransferase) encoded by strain DCMF may permit growth on methylamines amines and/or  
402 glycines (24). While strain DCMF was unable to metabolise trimethylamine, growth was observed  
403 with glycine betaine and the closely related compound choline. Both compounds are quaternary  
404 amines with significant environmental roles. Glycine betaine is an osmoprotectant widely used  
405 by bacteria (42–44), marine algae (45), marine invertebrates (46), plants (47), and some  
406 vertebrates (48). It is also an important source of nitrogen, comprising up to 20% of the total  
407 nitrogen in hypersaline environments (49). Choline is typically more abundant, albeit as a part of  
408 larger molecules including eukaryotic phospholipids, and can be converted to glycine betaine by  
409 a near ubiquitous pathway in soil and water environments (50).

410 Accordingly, strain DCMF encodes both the choline dehydrogenase (Ga0180325\_11215) and  
411 betaine aldehyde dehydrogenase (Ga0180325\_114191) required for this transformation to  
412 glycine betaine. Based on the stoichiometry of observed end products, growth on putative  
413 pathway intermediates, and genomic information, we propose that strain DCMF likely stepwise  
414 demethylates glycine betaine to dimethylglycine and then sarcosine (methylglycine), which is  
415 then reductively cleaved to form acetate (via acetyl-phosphate) and methylamine

A novel, dichloromethane fermenting bacterium

Holland *et al* (2020)

416 (Supplementary Discussion and Fig 6). The electron equivalents produced from demethylation  
417 can be used for additional reduction of CO<sub>2</sub> to acetate via the WLP, as well as the reductive  
418 cleavage of sarcosine. This combination of demethylation and reductive cleavage has previously  
419 only been observed in *Sporomusa* spp. (51,52) and is a novel metabolic pathway within the  
420 *Peptococcaceae* family. A theoretical energy balance of the product formation and strain DCMF  
421 cell yield suggested that no other organisms in culture DFE were involved in quaternary amine  
422 metabolism (Supplementary Discussion).

423 The strain DCMF genome also encodes a number of methanol methyltransferases, which are likely  
424 utilised for transformation of methanol into CH<sub>2</sub>=FH<sub>4</sub> prior to its entry into the WLP  
425 (Supplementary Discussion and Fig 6).

#### 426 *Environmental significance*

427 The ability of strain DCMF to utilise choline, glycine betaine and methanol suggests that its  
428 environmental relevance extends beyond DCM contaminated sites. Coastal salt marshes and  
429 intertidal mudflats represent significant sources of methane from the demethylation of  
430 trimethylamine, which is in turn derived from quaternary amines (53–55). Both trimethylamine  
431 and methanol are non-competitive methane precursors, which may allow large methanogen  
432 populations to develop in environments where sulphate reduction would typically dominate  
433 (56,57). Indeed, trimethylamine is responsible for 60 - 90% of methane production in coastal salt  
434 marshes and intertidal sediments (54,56). The transformation of quaternary amines to  
435 methylamine by strain DCMF provides a pathway of lower methanogenic potential that could  
436 operate in coastal subsurface environments. Strain DMCF does create acetate as a major end  
437 product, which can be utilised by acetoclastic methanogens. However, unlike methylated amines,  
438 methanogens have to compete with more thermodynamically favourable processes such as  
439 sulphate reduction for this substrate.

A novel, dichloromethane fermenting bacterium

Holland *et al* (2020)

440 Furthermore, DCM has recently also been recognised as a potent greenhouse gas with ozone-  
441 depleting potential (7), and oxygenated hydrocarbons such as methanol can influence  
442 atmospheric ozone formation through reactions with nitrous oxides (58). Therefore, although  
443 DCM, methanol, and quaternary amines are seemingly disparate substrates, they are closely  
444 linked to the atmospheric flux of climate-active gasses from anoxic, subsurface environments.  
445 This is both via the direct influence that DCM and methanol can have on ozone, and the indirect  
446 influence of quaternary amines on the flux of methylated amines and methane.

447 *Provisional classification of strain DCMF as a novel genus and species*

448 In addition to previously reported 16S rRNA gene phylogeny (24), whole genome analysis of  
449 universally conserved marker genes and amino acid identity methods showed the closest relative  
450 of strain DCMF to be *D. formicoaceticum* strain DMC (Supplementary Methods and Results). While  
451 the former two methods support the placement of strain DCMF in a novel genus, the latter was  
452 on the borderline of suggested thresholds (Supplementary Results). However, the physiological  
453 information presented here distinguishes strain DCMF from the sole representative of the genus  
454 *Dehalobacterium*, which has thus far only proved capable of growth on DCM (15). Strain DCMF  
455 also harbours a significantly larger genome than *D. formicoaceticum* (6.44 Mb for the former, 3.77  
456 Mb for the latter) (22), which may account for its wider substrate range. Strain DCMF appears to  
457 be an anaerobic methylotroph, capable of metabolising a unique range of one-carbon compounds  
458 (DCM, methanol) or substrates from which it can utilise methyl groups (choline, glycine betaine,  
459 dimethylglycine, sarcosine). Thus, multiple lines of evidence support the placement of strain  
460 DCMF within a novel genus in the family *Peptococcaceae*. As strain DCMF is not yet represented  
461 in pure culture despite intensive efforts to isolate the organism, we propose it be classified in the  
462 *Candidatus* category (59) as '*Candidatus* Formamonas warabiya' strain DCMF gen. nov. sp. nov.

463

A novel, dichloromethane fermenting bacterium

Holland *et al* (2020)

464 *Description of 'Candidatus Formamonas' gen. nov.*

465 '*Candidatus* Formamonas [Form.a.mon'as. L. adj. *formicum* relating to formic acid or, more  
466 generally, one-carbon compounds; Gr. n. *monas* unit; ML. n. *Formamonas* the one-carbon utilising  
467 unit.

468 '*Candidatus* Formamonas' is strictly anaerobic and metabolises one-carbon and methylated  
469 compounds including DCM, methanol and quaternary amines glycine. Methylene/methyl groups  
470 are metabolised via incorporation into the WLP. The type species is '*Candidatus* Formamonas  
471 warabiya'.

472 *Description of 'Candidatus Formamonas warabiya' sp. nov.*

473 '*Candidatus* Formamonas warabiya [war.a.bi'ya N.L. n. *warabiya* the Dharawal name for the area  
474 between Botany Bay and Bunnerong, honouring the Traditional Custodians of the land where this  
475 bacterium was sampled from]. Permission was granted from the Dharawal Language Program  
476 research group for use of this word as the species name.

477 Utilises DCM, methanol, choline, glycine betaine, dimethylglycine as sole sources of electrons  
478 under anoxic conditions. Can also utilise the electron donor and acceptor pair H<sub>2</sub> and sarcosine.  
479 The aforementioned substrates plus CO<sub>2</sub> are carbon sources. The primary fermentation product  
480 is acetate. Methylamine is also produced from choline, glycine betaine, dimethylglycine, and  
481 sarcosine + H<sub>2</sub>. The WLP is likely used for carbon fixation and metabolism of the methyl groups  
482 removed from substrates. Cells are rod shaped (1.69 × 0.27 μm).

483 Type strain DCMF<sup>T</sup> is not available in pure culture. The source of inoculum was contaminated  
484 sediment from the Botany Sands aquifer, adjacent to Botany Bay, Sydney, Australia. The type  
485 material is the finished genome of '*Candidatus* Formamonas warabiya' strain DCMF, which is 6.44  
486 Mb and has a G+C content of 46.4% (GenBank accession number CP017634.1; IMG genome ID  
487 2718217647).



A novel, dichloromethane fermenting bacterium

Holland *et al* (2020)

488 **Acknowledgements**

489 We are grateful to Kate Montgomery in the School of Biotechnology and Biomolecular Science,  
490 UNSW, for her assistance with FISH microscopy. Thanks to Dr Valentina Wong for her initial  
491 culturing assistance. SH was supported by an Australian Government Research Training Program  
492 Scholarship.

493 **References**

- 494 1. Shestakova M, Sillanpää M. Removal of dichloromethane from ground and wastewater: A  
495 review. *Chemosphere*. 2013;93(7):1258–67.
- 496 2. Gribble GW. Naturally Occurring Organohalogen Compounds: A Comprehensive Update.  
497 In: *Progress in the Chemistry of Organic Natural Products*. Volume 91. Springer Science &  
498 Business Media; 2010. p. 12–3.
- 499 3. Carpenter LJ, Reimann S. Scientific assessment of ozone depletion: 2014. In: Engel A,  
500 Montzka SA, editors. *Global Ozone Research and Monitoring Project - Report No 55*. World  
501 Meteorological Organization; 2014.
- 502 4. Hossaini R, Chipperfield MP, Montzka SA, Rap A, Dhomse S, Feng W. Efficiency of short-  
503 lived halogens at influencing climate through depletion of stratospheric ozone. *Nat Geosci*.  
504 2015;8(3):186–90.
- 505 5. Hossaini R, Chipperfield MP, Saiz-Lopez A, Harrison JJ, Von Glasow R, Sommariva R, et al.  
506 Growth in stratospheric chlorine from short-lived chemicals not controlled by the  
507 Montreal Protocol. *Geophys Res Lett*. 2015;42(11):4573–80.
- 508 6. Leedham Elvidge EC, Oram DE, Laube JC, Baker AK, Montzka SA, Humphrey S, et al.  
509 Increasing concentrations of dichloromethane, CH<sub>2</sub>Cl<sub>2</sub>, inferred from CARIBIC air samples  
510 collected 1998-2012. *Atmos Chem Phys*. 2015;15(4):1939–58.
- 511 7. Hossaini R, Chipperfield MP, Montzka SA, Leeson AA, Dhomse SS, Pyle JA. The increasing  
512 threat to stratospheric ozone from dichloromethane. *Nat Commun*. 2017 Dec  
513 27;8(1):15962.
- 514 8. International Agency for Research on Cancer. Dichloromethane. In: *IARC monograph on  
515 the evaluation of the carcinogenic risk of chemicals to humans*. 41st ed. Lyon, France; 1986.

516 p. 43–85.

517 9. Agency for Toxic Substances and Disease Registry. Toxicological profile for methylene  
518 chloride. Atlanta, Georgia; 2000.

519 10. Stuckey DC, Owen WF, McCarty PL, Parkin GF. Anaerobic toxicity evaluation by batch and  
520 semi-continuous assays. J (Water Pollut Control Fed. 1980;52(4):720–9.

521 11. Kanazawa S, Filip Z. Effects of trichloroethylene, tetrachloroethylene and dichloromethane  
522 on enzymatic activities in soil. Appl Microbiol Biotechnol. 1986;25:76–81.

523 12. Yu Z, Smith GB. Inhibition of methanogenesis by C1- and C2-polychlorinated aliphatic  
524 hydrocarbons. Environ Toxicol Chem. 2000;19(9):2212–7.

525 13. La Roche SD, Leisinger T. Sequence analysis and expression of the bacterial  
526 dichloromethane dehalogenase structural gene, a member of the glutathione-S-transferase  
527 supergene family. J Bacteriol. 1990;172(1):164–71.

528 14. Muller EEL, Bringel F, Vuilleumier S. Dichloromethane-degrading bacteria in the genomic  
529 age. Res Microbiol. 2011;162(9):870–6.

530 15. Mägli A, Wendt M, Leisinger T. Isolation and characterization of *Dehalobacterium*  
531 *formicoaceticum* gen. nov. sp. nov., a strictly anaerobic bacterium utilizing  
532 dichloromethane as source of carbon and energy. Arch Microbiol. 1996;166(2):101–8.

533 16. Lee M, Low A, Zemb O, Koenig J, Michaelsen A, Manefield M. Complete chloroform  
534 dechlorination by organochlorine respiration and fermentation. Environ Microbiol. 2012  
535 Apr;14(4):883–94.

536 17. Justicia-Leon SD, Ritalahti KM, Mack EE, Löffler FE. Dichloromethane fermentation by a  
537 *Dehalobacter* sp. in an enrichment culture derived from pristine river sediment. Appl  
538 Environ Microbiol. 2012 Feb;78(4):1288–91.

A novel, dichloromethane fermenting bacterium

Holland *et al* (2020)

- 539 18. Trueba-Santiso A, Parladé E, Rosell M, Lliros M, Mortan SH, Martínez-Alonso M, et al.  
540 Molecular and carbon isotopic characterization of an anaerobic stable enrichment culture  
541 containing *Dehalobacterium* sp. during dichloromethane fermentation. *Sci Total Environ.*  
542 2017 Mar;581–582:640–8.
- 543 19. Kleindienst S, Higgins SA, Tsementzi D, Chen G, Konstantinidis KT, Mack EE, et al.  
544 '*Candidatus* Dichloromethanomonas elyunquensis' gen. nov., sp. nov., a dichloromethane-  
545 degrading anaerobe of the *Peptococcaceae* family. *Syst Appl Microbiol.* 2017;40:150–9.
- 546 20. Kleindienst S, Chourey K, Chen G, Murdoch RW, Higgins SA, Iyer R, et al. Proteogenomics  
547 reveals novel reductive dehalogenases and methyltransferases expressed during  
548 anaerobic dichloromethane metabolism. *Appl Environ Microbiol.* 2019;85(6):1–16.
- 549 21. Kleindienst S, Higgins SA, Tsementzi D, Konstantinidis KT, Mack EE, Löffler FE. Draft  
550 genome sequence of a strictly anaerobic dichloromethane-degrading bacterium. *Genome*  
551 *Announc.* 2016;4(2):e00037-16.
- 552 22. Chen G, Murdoch RW, Mack EE, Seger ES, Löffler FE. Complete genome sequence of  
553 *Dehalobacterium formicoaceticum* strain DMC, a strictly anaerobic dichloromethane-  
554 degrading bacterium. *Genome Announc.* 2017;5(37):18–9.
- 555 23. Chen G, Fisch AR, Gibson CM, Erin Mack E, Seger ES, Campagna SR, et al. Mineralization  
556 versus fermentation: evidence for two distinct anaerobic bacterial degradation pathways  
557 for dichloromethane. *ISME J.* 2020;14:959–970.
- 558 24. Holland SI, Edwards RJ, Ertan H, Wong YK, Russell TL, Deshpande NP, et al. Whole genome  
559 sequencing of a novel, dichloromethane-fermenting *Peptococcaceae* from an enrichment  
560 culture. *PeerJ.* 2019 Oct 2;7:e7775.
- 561 25. Murray AE, Freudenstein J, Gribaldo S, Hatzenpichler R, Hugenholtz P, Kämpfer P, et al.  
562 Roadmap for naming uncultivated Archaea and Bacteria. *Nat Microbiol.* 2020;

A novel, dichloromethane fermenting bacterium

Holland *et al* (2020)

- 563 26. Villas-Bôas SG, Delicado DG, Åkesson M, Nielsen J. Simultaneous analysis of amino and  
564 nonamino organic acids as methyl chloroformate derivatives using gas chromatography-  
565 mass spectrometry. *Anal Biochem.* 2003;322(1):134–8.
- 566 27. Maeda H, Fujimoto C, Haruki Y, Maeda T, Koikeguchi S, Petelin M, et al. Quantitative real-  
567 time PCR using TaqMan and SYBR Green for *Actinobacillus actinomycetemcomitans*,  
568 *Porphyromonas gingivalis*, *Prevotella intermedia*, *tetQ* gene and total bacteria. *FEMS*  
569 *Immunol Med Microbiol.* 2003;39(1):81–6.
- 570 28. Caporaso JG, Kuczynski J, Stombaugh J, Bittinger K, Bushman FD, Costello EK, et al. QIIME  
571 allows analysis of high- throughput community sequencing data. *Nat Methods.*  
572 2010;7(5):335–6.
- 573 29. Callahan BJ, McMurdie PJ, Rosen MJ, Han AW, Johnson AJA, Holmes SP. DADA2: High-  
574 resolution sample inference from Illumina amplicon data. *Nat Methods.* 2016;13(7):581–  
575 3.
- 576 30. Ludwig W, Strunk O, Westram R, Richter L, Meier H, Yadhukumar A, et al. ARB: A software  
577 environment for sequence data. *Nucleic Acids Res.* 2004;32(4):1363–71.
- 578 31. Amann RI, Binder BJ, Olson RJ, Chisholm SW, Devereux R, Stahl DA. Combination of 16S  
579 rRNA-targeted oligonucleotide probes with flow cytometry for analyzing mixed microbial  
580 populations. *Appl Environ Microbiol.* 1990;56(6):1919–25.
- 581 32. Ferrari BC, Winsley T, Gillings M, Binnerup S. Cultivating previously uncultured soil  
582 bacteria using a soil substrate membrane system. *Nat Protoc.* 2008;3(8):1261–9.
- 583 33. Roller C, Wagner M, Amann R, Ludwig W, Schleifer K-H. In situ probing of Gram-positive  
584 bacteria with high DNA G+C content using 23S rRNA-targeted oligonucleotides.  
585 *Microbiology.* 1994;140:2849–58.

A novel, dichloromethane fermenting bacterium

Holland *et al* (2020)

- 586 34. Duhamel M, Edwards EA. Microbial composition of chlorinated ethene-degrading cultures  
587 dominated by *Dehalococcoides*. FEMS Microbiol Ecol. 2006 Dec;58(3):538–49.
- 588 35. Kleinsteuber S, Schleinitz KM, Breinfeld J, Harms H, Richnow HH, Vogt C. Molecular  
589 characterization of bacterial communities mineralizing benzene under sulfate-reducing  
590 conditions. FEMS Microbiol Ecol. 2008;66(1):143–57.
- 591 36. Strąpoc D, Mastalerz M, Dawson K, Macalady J, Callaghan A V., Wawrik B, et al.  
592 Biogeochemistry of microbial coal-bed methane. Annu Rev Earth Planet Sci.  
593 2011;39(1):617–56.
- 594 37. Taubert M, Vogt C, Wubet T, Kleinsteuber S, Tarkka MT, Harms H, et al. Protein-SIP enables  
595 time-resolved analysis of the carbon flux in a sulfate-reducing, benzene-degrading  
596 microbial consortium. ISME J. 2012;6(12):2291–301.
- 597 38. Dong X, Greening C, Bröls T, Conrad R, Guo K, Blaskowski S, et al. Fermentative  
598 Spirochaetes mediate necromass recycling in anoxic hydrocarbon-contaminated habitats.  
599 ISME J. 2018;12(8):2039–50.
- 600 39. Kleinsteuber S, Schleinitz KM, Vogt C. Key players and team play: Anaerobic microbial  
601 communities in hydrocarbon-contaminated aquifers. Appl Microbiol Biotechnol.  
602 2012;94(4):851–73.
- 603 40. Mägli A, Messmer M, Leisinger T. Metabolism of dichloromethane by the strict anaerobe  
604 *Dehalobacterium formicoaceticum*. Appl Environ Microbiol. 1998;64(2):646–50.
- 605 41. Trueba-Santiso A, Fernández-Verdejo D, Marco-Rius I, Soder-Walz JM, Casabella O, Vicent  
606 T, et al. Interspecies interaction and effect of co-contaminants in an anaerobic  
607 dichloromethane-degrading culture. Chemosphere. 2020;240:124877.
- 608 42. Galinski EA, Trüper HG. Betaine, a compatible solute in the extremely halophilic

- 609 phototrophic bacterium *Ectothiorhodospira halochloris*. FEMS Microbiol Lett.  
610 1982;13(4):357–60.
- 611 43. Imhoff JF. Osmoregulation and compatible solutes in eubacteria. FEMS Microbiol Rev.  
612 1986;39:57–66.
- 613 44. Csonka LN. Physiological and genetic responses of bacteria to osmotic stress. Microbiol  
614 Rev. 1989;53:121–47.
- 615 45. Blunden G, Gordon SM, McLean WFH, Guiry MD. The distribution and possible taxonomic  
616 significance of quaternary ammonium and other Dragendorff-positive compounds in some  
617 genera of marine algae. Bot Mar. 1982;XXV:536–67.
- 618 46. Beers JR. The species distribution of some naturally occurring quaternary ammonium  
619 compounds. Comp Biochem Physiol. 1967;21:11–21.
- 620 47. Larher F, Jolivet Y, Briens U, Goas U. Osmoregulation in higher plants halophytes: organic  
621 nitrogen accumulation in glycine, betaine, and proline during the growth of *Aster*  
622 *tripolinum* and *Sueda macrocarpa* under saline conditions. Plant Sci Lett. 1982;24:201–10.
- 623 48. Yancey PH, Clark ME, Hand SC, Bowlus RD, Somero GN. Living with water stress: Evolution  
624 of osmolyte systems. Science (80- ). 1982;217:1214–22.
- 625 49. King GM. Methanogenesis from methylated amines in a hypersaline algal mat. Appl  
626 Environ Microbiol. 1988;54(1):130–6.
- 627 50. Wargo MJ. Homeostasis and catabolism of choline and glycine betaine: Lessons from  
628 *Pseudomonas aeruginosa*. Appl Environ Microbiol. 2013;79(7):2112–20.
- 629 51. Möller B, Oßmer R, Howard BH, Gottschalk G, Hippe H. *Sporomusa*, a new genus of gram-  
630 negative anaerobic bacteria including *Sporomusa sphaeroides* spec. nov. and *Sporomusa*  
631 *ovata* spec. nov. Arch Microbiol. 1984;139:388–96.

A novel, dichloromethane fermenting bacterium

Holland *et al* (2020)

- 632 52. Visser M, Pieterse MM, Pinkse MWH, Nijse B, Verhaert PDEM, de Vos WM, et al.  
633 Unravelling the one-carbon metabolism of the acetogen *Sporomusa* strain An4 by genome  
634 and proteome analysis. *Environ Microbiol.* 2016;18(9):2843–55.
- 635 53. Jameson E, Stephenson J, Jones H, Millard A, Kaster A-K, Purdy KJ, et al. *Deltaproteobacteria*  
636 (*Pelobacter*) and *Methanococcoides* are responsible for choline-dependent  
637 methanogenesis in a coastal saltmarsh sediment. *ISME J.* 2019 Feb 11;13(2):277–89.
- 638 54. King GM. Metabolism of trimethylamine, choline, and glycine betaine by sulfate-reducing  
639 and methanogenic bacteria in marine sediments. *Appl Environ Microbiol.*  
640 1984;48(4):719–25.
- 641 55. King GM. Distribution and metabolism of quaternary amines in marine sediments. In:  
642 Blackburn TH, Soorensen J, editors. *Nitrogen Cycling in Coastal Marine Environments.* John  
643 Wiley & Sons; 1988. p. 143–73.
- 644 56. Oremland RS, Marsh LM, Polcin S. Methane production and simultaneous sulphate  
645 reduction in anoxic, salt marsh sediments. *Nature.* 1982;296:143–5.
- 646 57. Oremland RS, Polcin S. Methanogenesis and sulfate reduction: Competitive and  
647 noncompetitive substrates in estuarine sediments. *Appl Environ Microbiol.*  
648 1982;44(6):1270–6.
- 649 58. Finlayson-Pitts BJ, Pitts NJJ. *Chemistry of the Upper and Lower Atmosphere.* San Diego, CA:  
650 Academic Press; 2000.
- 651 59. Murray RGE, Stackebrandt E. Taxonomic Note: Implementation of the provisional status  
652 *Candidatus* for incompletely described procaryotes. *Int J Syst Bacteriol.* 1995;45(1):186–  
653 7.
- 654
